# Supplementary material for: A new multi-variable benchmark for Last Glacial Maximum climate simulations
Source: Copernicus journal article supplement (doi:10.5194/cp-2019-55), 2019-06-05
Supplement: Supplementary file 2 [file cp-2019-55-supplement.zip]

**A new multi-variable benchmark for Last Glacial Maximum simulations:  
Supplementary Information**

Sean F. Cleator<sup>1</sup>, Sandy P. Harrison<sup>2</sup>, Nancy K. Nichols<sup>3</sup>, I. Colin Prentice<sup>4</sup> and Ian Roulstone<sup>1</sup>

1: Department of Mathematics, University of Surrey, Guildford GU2 7XH, UK

2: School of Archaeology, Geography and Environmental Science, University of Reading, Whiteknights, Reading, RG6 6AH, UK

3: Department of Mathematics & Statistics, University of Reading, Whiteknights, Reading RG6 6AX, UK

4: AXA Chair of Biosphere and Climate Impacts, Department of Life Sciences, Imperial College London, Silwood Park Campus, Buckhurst Road, Ascot SL5 7PY, UK

This supplementary information contains maps of the multi-model mean climate (SI Figure 1) and its standard deviation (SI Figure 2) of the ensemble of simulations of the Last Glacial Maximum from the Palaeoclimate Modelling Intercomparison Project (PMIP), as well as maps of the original site based reconstructions from Bartlein et al. (2011) and Prentice et al. (2017).

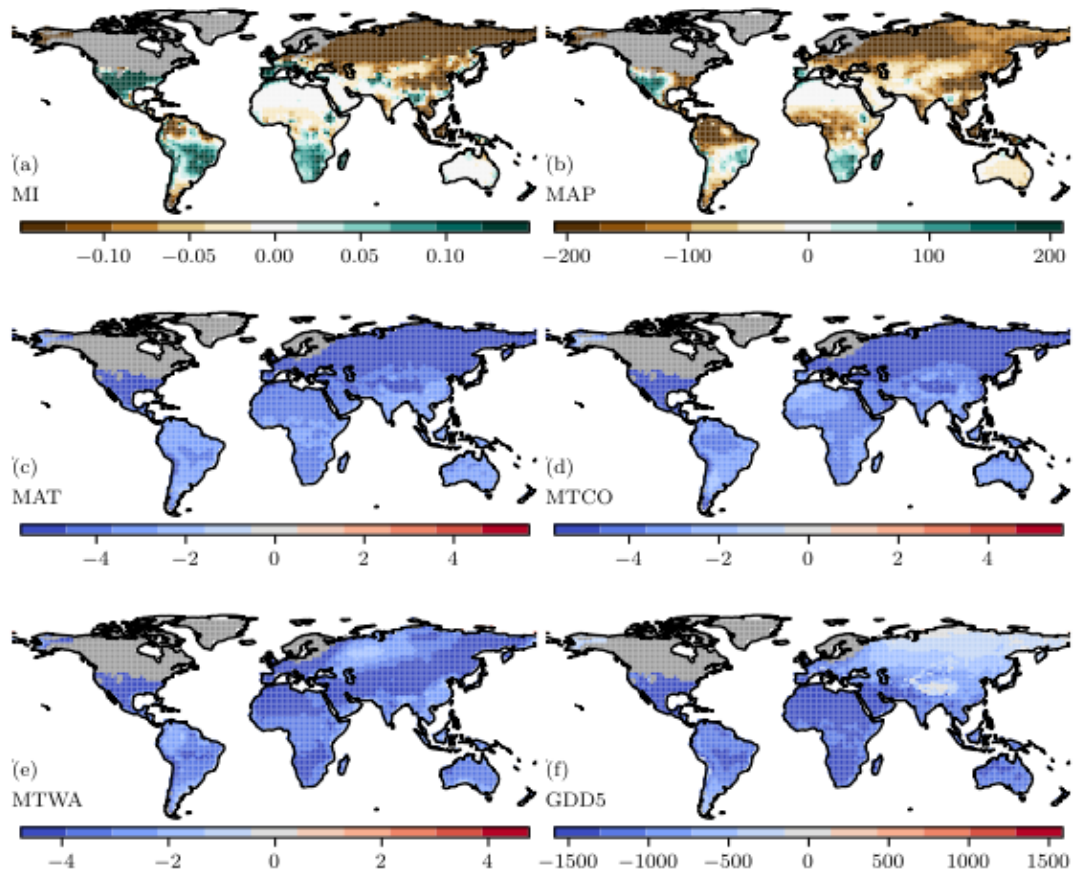

SI Figure 1: The multi-model mean climate of the ensemble of models from the Palaeoclimate Modelling Intercomparison Project (PMIP). The individual plots show the simulated (a) moisture index (MI), (b) mean annual precipitation (MAP), (c) mean annual temperature (MAT), (d) mean temperature of the coldest month (MTCO), (e) mean temperature of the warmest month (MTWA) and growing degree days above a baseline of 5° C (GDD5).

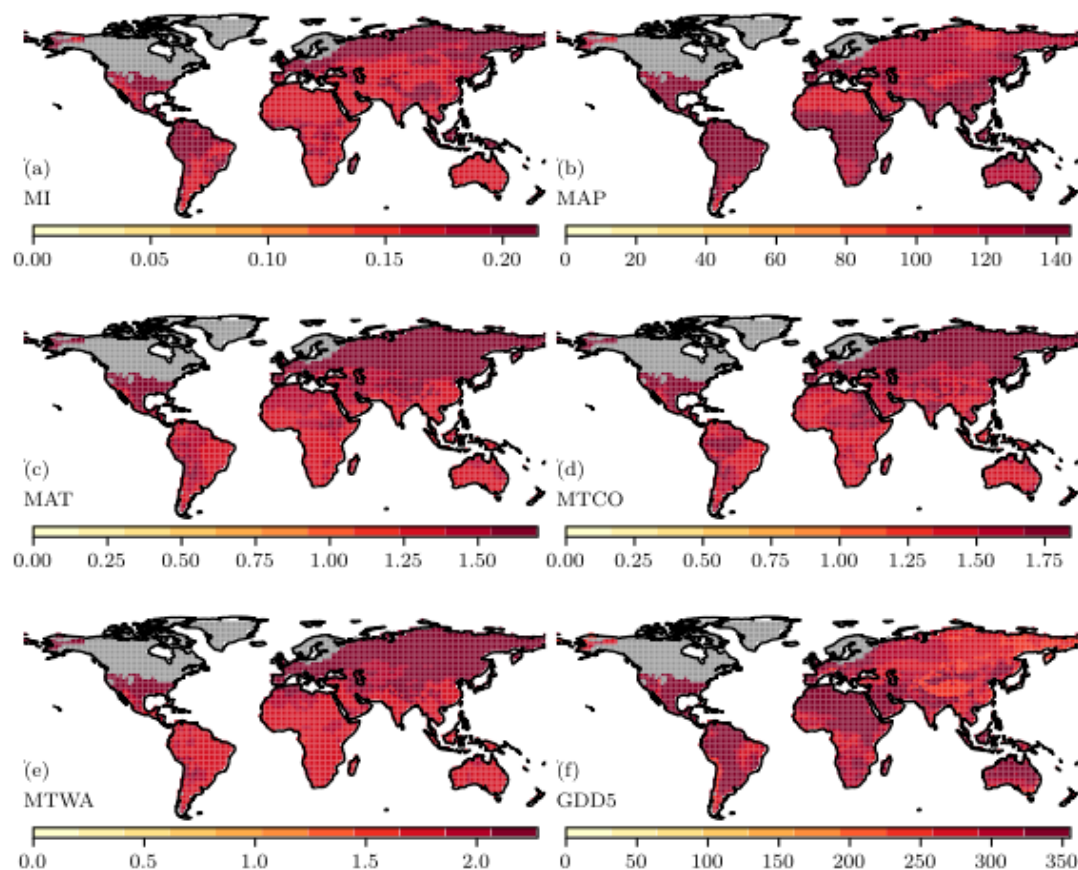

825 SI Figure 2: The standard deviation of the multi-model mean climate of the ensemble  
 826 of models from the Palaeoclimate Modelling Intercomparison Project (PMIP). The  
 827 individual plots show the simulated (a) moisture index (MI), (b) mean annual  
 828 precipitation (MAP), (c) mean annual temperature (MAT), (d) mean temperature of  
 829 the coldest month (MTCO), (e) mean temperature of the warmest month (MTWA)  
 830 and growing degree days above a baseline of 5° C (GDD5).

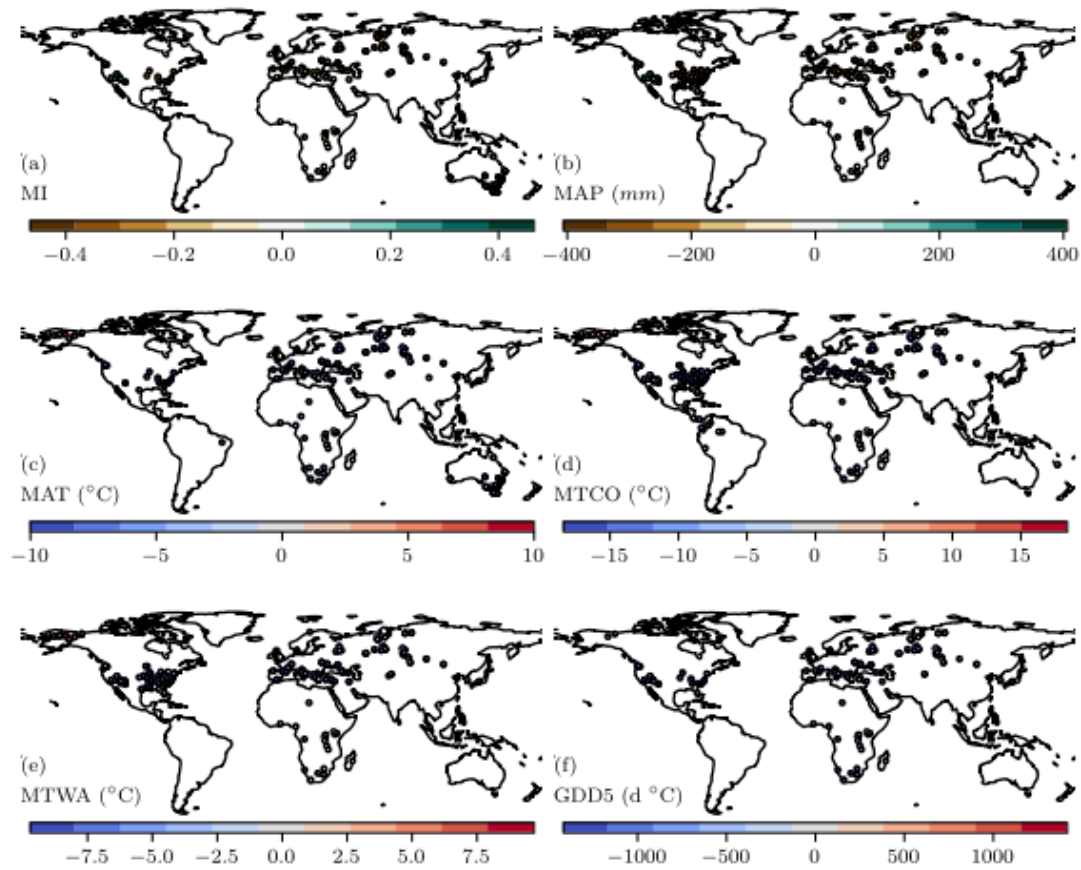

832 SI Figure 3: Site-based reconstructions of climatic variables at the Last Glacial  
 833 Maximum. The plots show reconstructions of (a) moisture index (MI), (b) mean  
 834 annual precipitation (MAP), (c) mean annual temperature (MAT), (d) mean  
 835 temperature of the coldest month (MTCO), (e) mean temperature of the warmest  
 836 month (MTWA), and (f) growing degree days above a baseline of 5°C (GDD5). The  
 837 original reconstructions are from Bartlein et al. (2011) and Prentice et al. (2017).
