# Supplementary figures and images for: A new multi-variable benchmark for Last Glacial Maximum climate simulations
Source: Copernicus journal article supplement (doi:10.5194/cp-2019-55), 2019-06-05

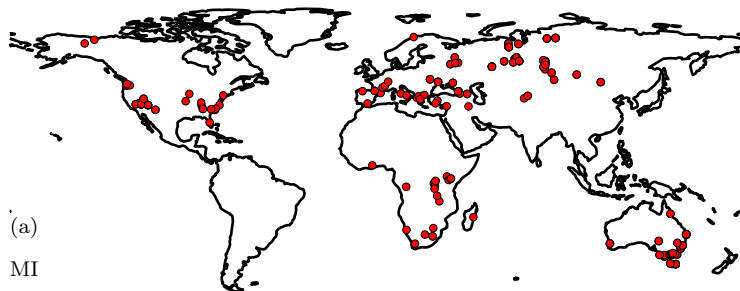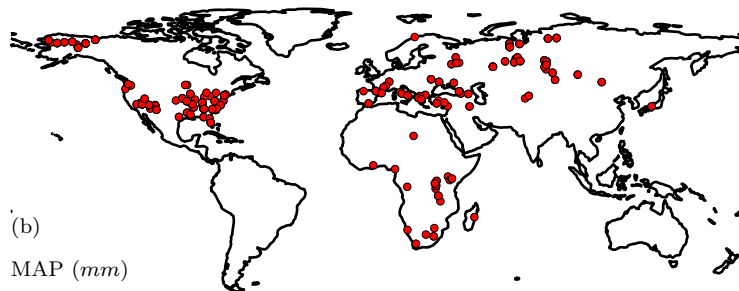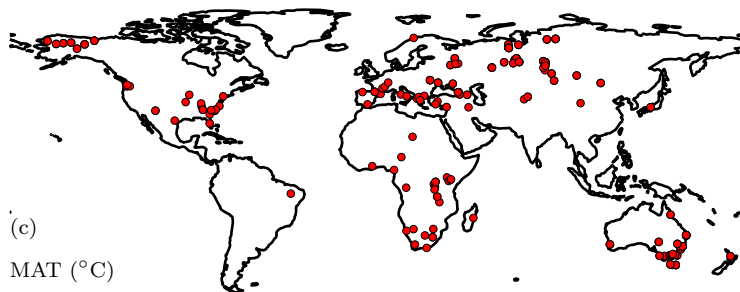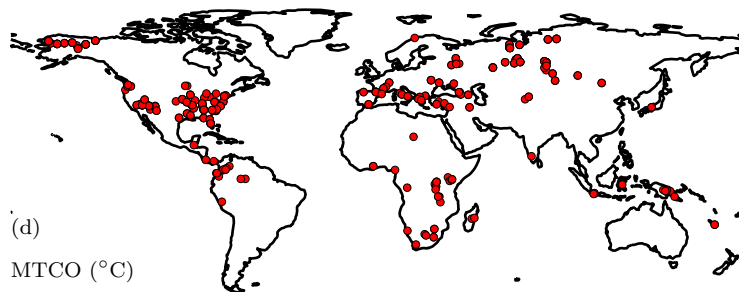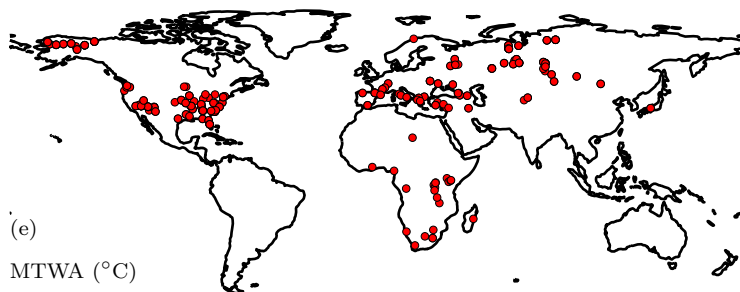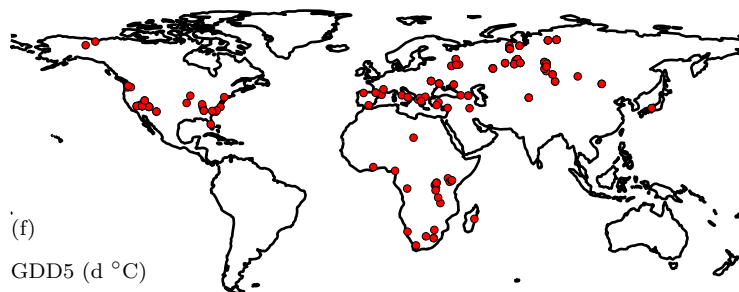

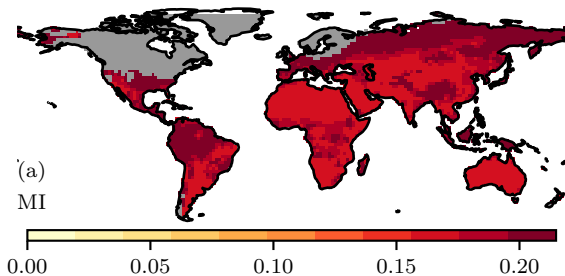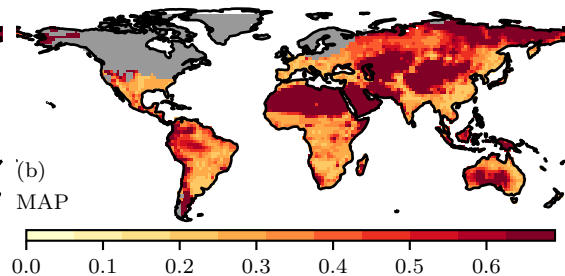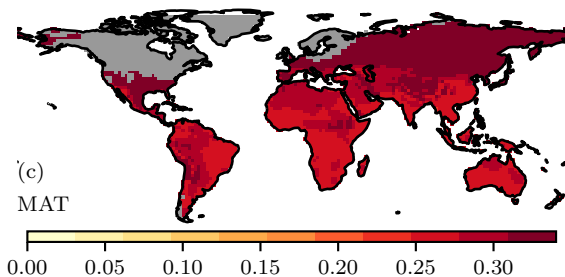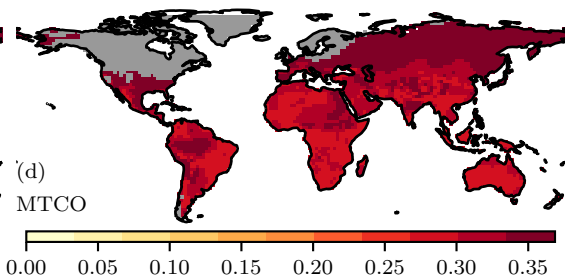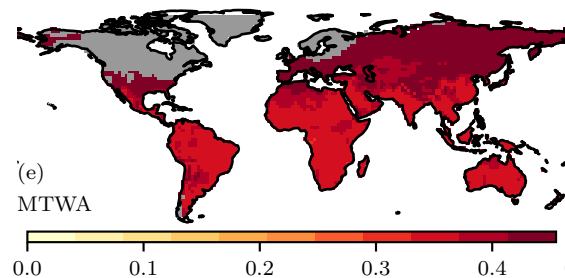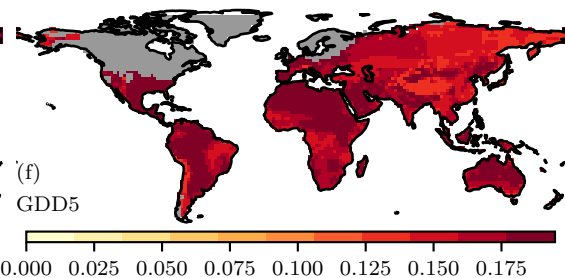

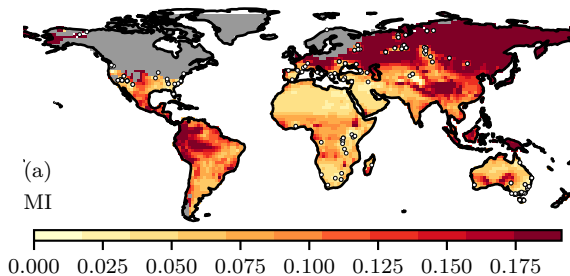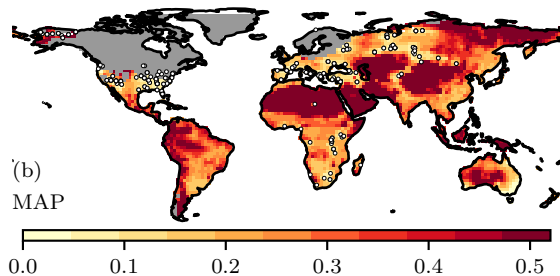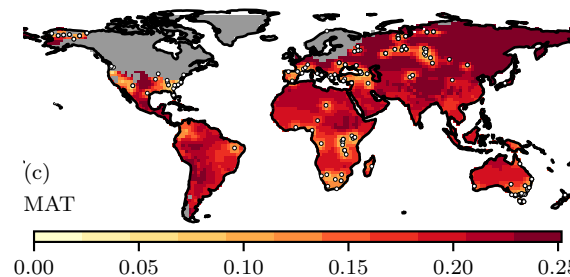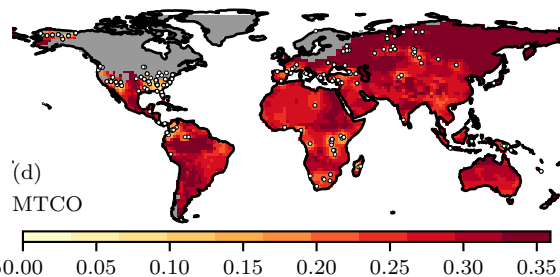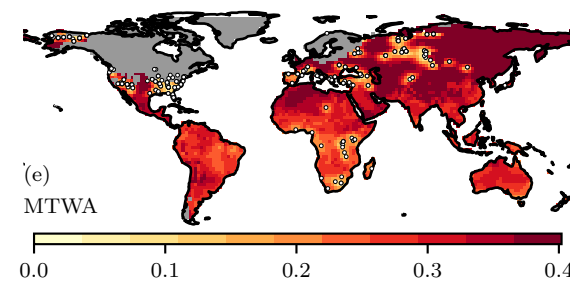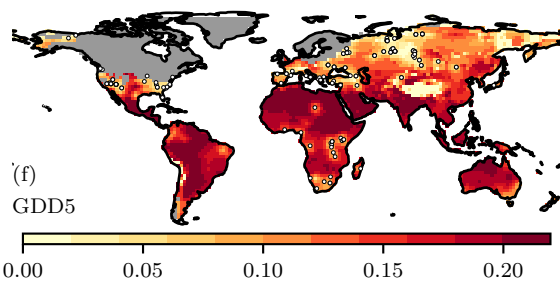

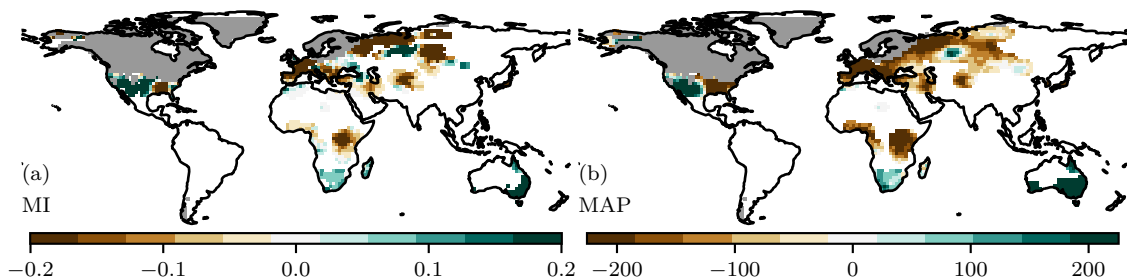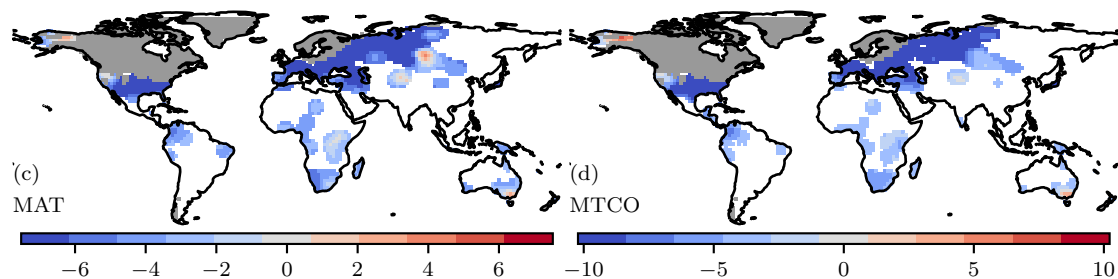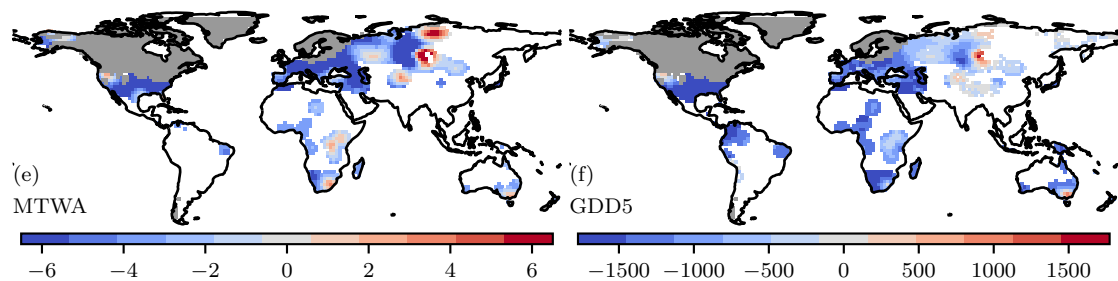

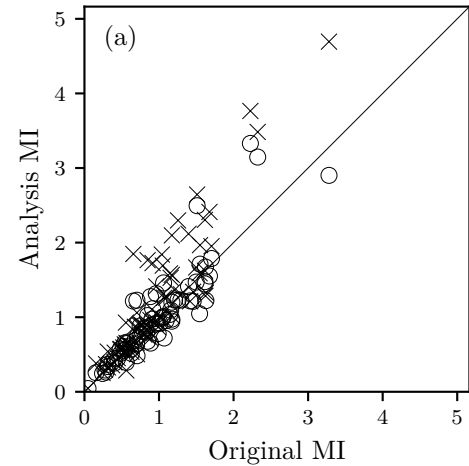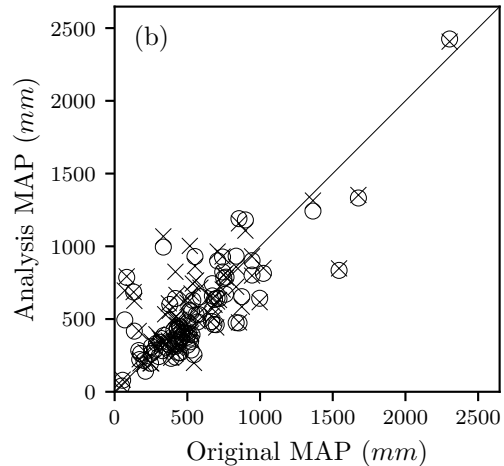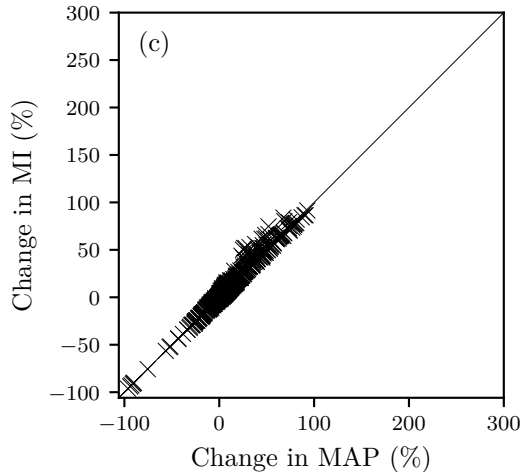

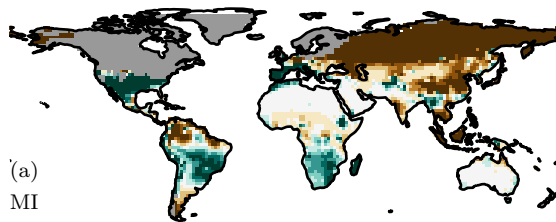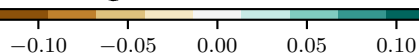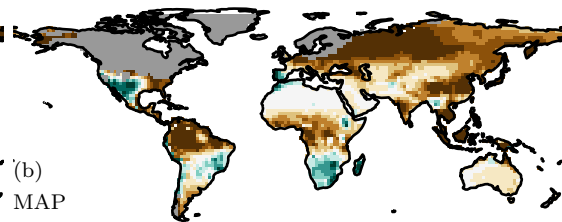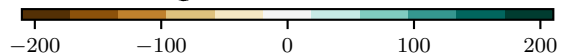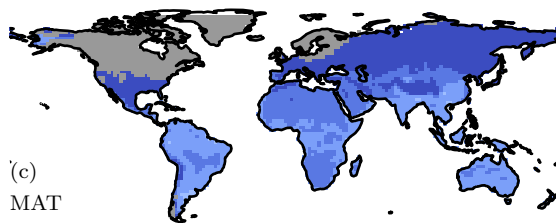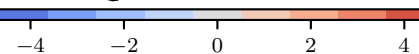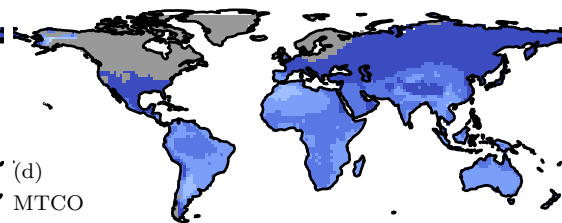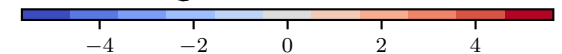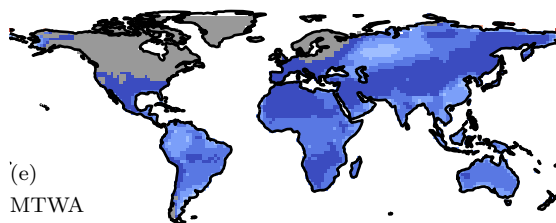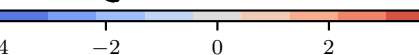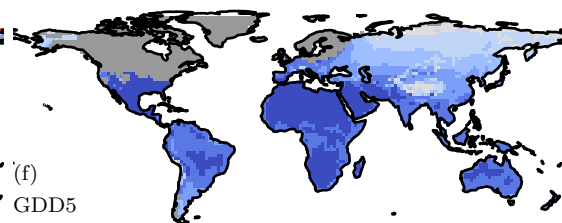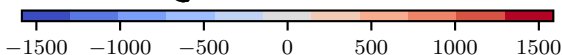

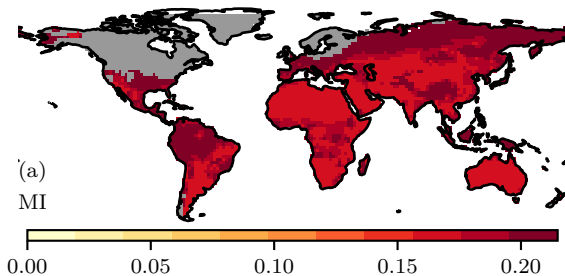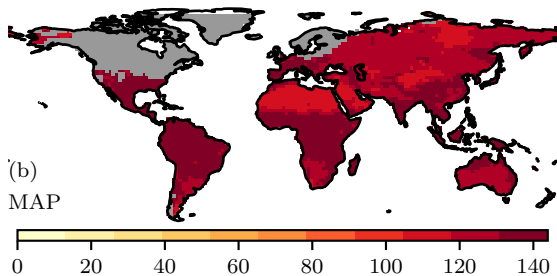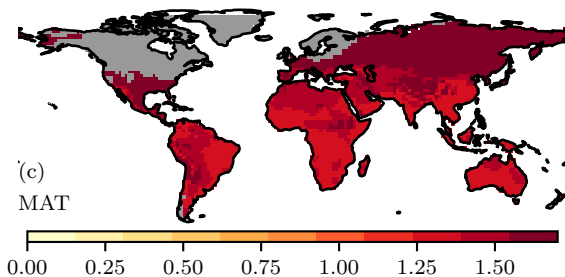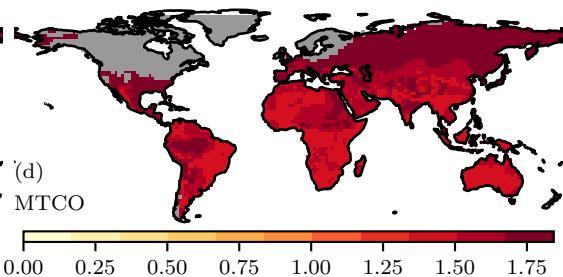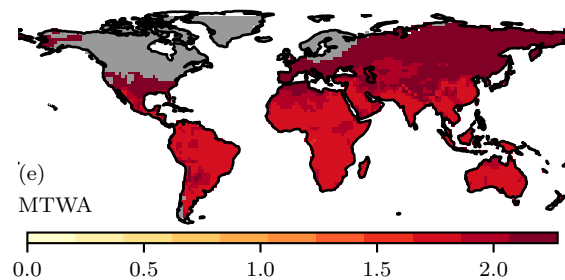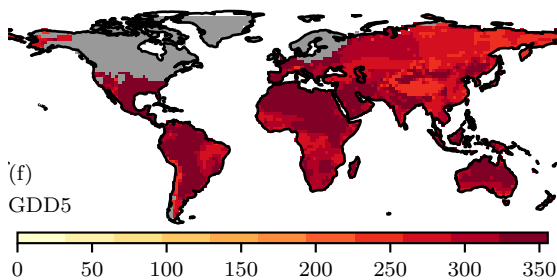

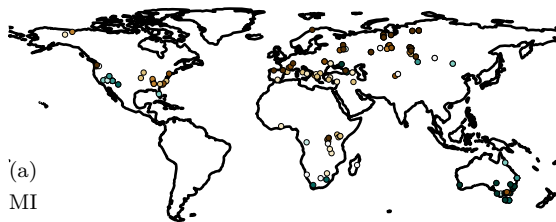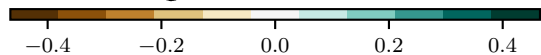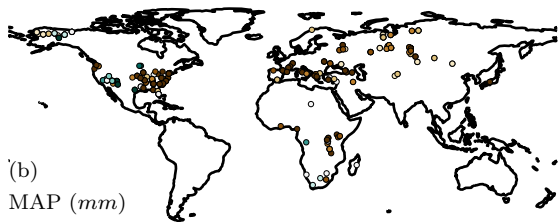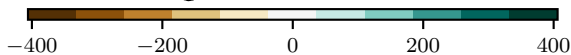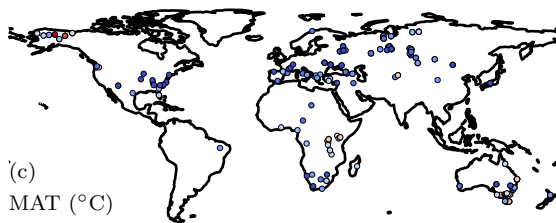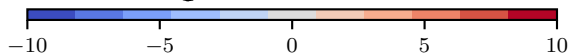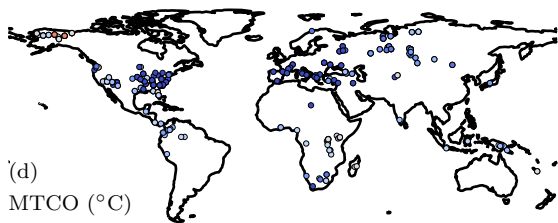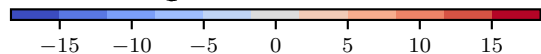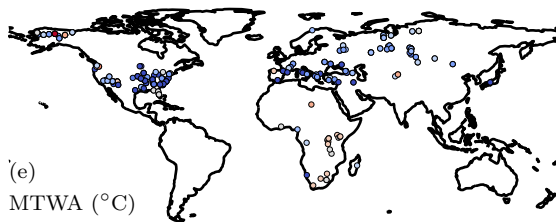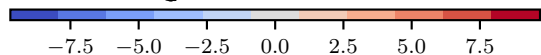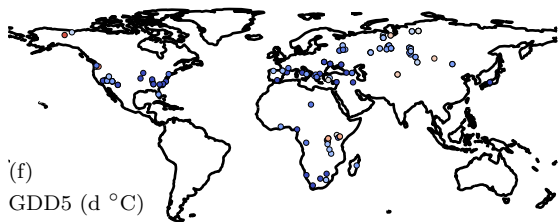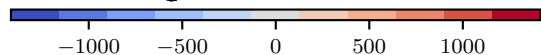

Supplement: Supplementary file 1 [file cp-2019-55-supplement.zip]
